# Supplementary material
Source: MDPI journal article supplement (https://www.mdpi.com/2227-9040/9/7/160)
Supplement: s1 [file s1]

# Bifunctionalized gold nanoparticles for the colorimetric detection of the drug $\gamma$ -hydroxybutyric acid (GHB) in beverages

Silvia Rodríguez-Nuévalos, Ana M. Costero\*, Salvador Gil, Margarita Parra, Pablo Gaviña\*

## Content

|                                                                                                                                                                         |   |
|-------------------------------------------------------------------------------------------------------------------------------------------------------------------------|---|
| <b>NMR Spectra</b> .....                                                                                                                                                | 2 |
| Figure S1. $^1\text{H}$ NMR spectrum of <b>L1</b> .....                                                                                                                 | 2 |
| Figure S2. $^{13}\text{C}$ NMR spectrum of <b>L1</b> .....                                                                                                              | 2 |
| Figure S3. $^1\text{H}$ NMR spectrum of <b>L2</b> .....                                                                                                                 | 3 |
| Figure S4. $^{13}\text{C}$ NMR spectrum of <b>L2</b> .....                                                                                                              | 3 |
| <b>Mass Spectrometry Spectra</b> .....                                                                                                                                  | 4 |
| Figure S5. Mass Spectrometry Spectrum of <b>L1</b> .....                                                                                                                | 4 |
| Figure S6. Mass Spectrometry Spectrum of <b>L2</b> .....                                                                                                                | 4 |
| <b>GNP1 Characterization</b> .....                                                                                                                                      | 5 |
| Figure S7. <b>GNP1</b> DLS size distribution .....                                                                                                                      | 5 |
| Figure S8. <b>GNP1</b> stability in different buffers .....                                                                                                             | 5 |
| <b>UV-Vis Spectra</b> .....                                                                                                                                             | 6 |
| Figure S9. UV-visible changes of sensor <b>GNP1</b> with 35 mM GHB and a 35 mM mixture of AcONa/EtOH using water deionised as solvent. ....                             | 6 |
| Figure S10. Absorbance spectra of <b>GNP1</b> in the presence of citric acid, sodium ascorbate, in the real concentration present in beverages, and NaGHB (35 mM). .... | 6 |
| <b>Real samples</b> .....                                                                                                                                               | 7 |
| Figure S11. Colour changes in real samples .....                                                                                                                        | 7 |
| Figure S12. Instructions sheet for an on-site safety kit based on GHB detection.....                                                                                    | 7 |

## NMR Spectra

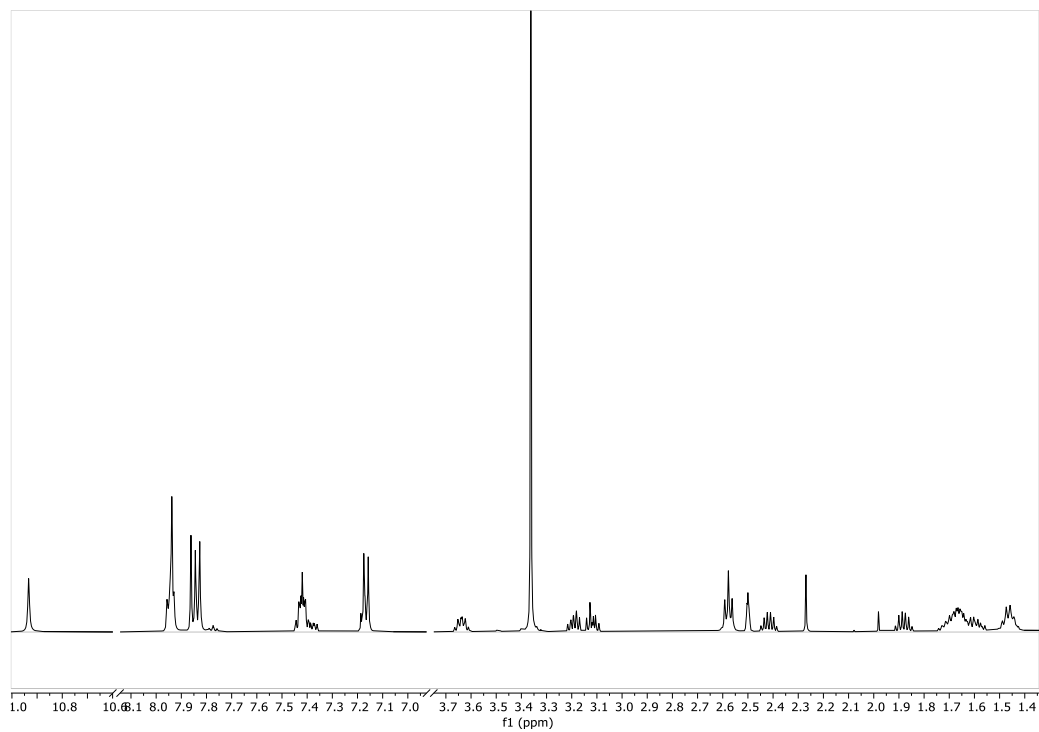

Figure S1.  $^1\text{H}$  NMR spectrum of L1

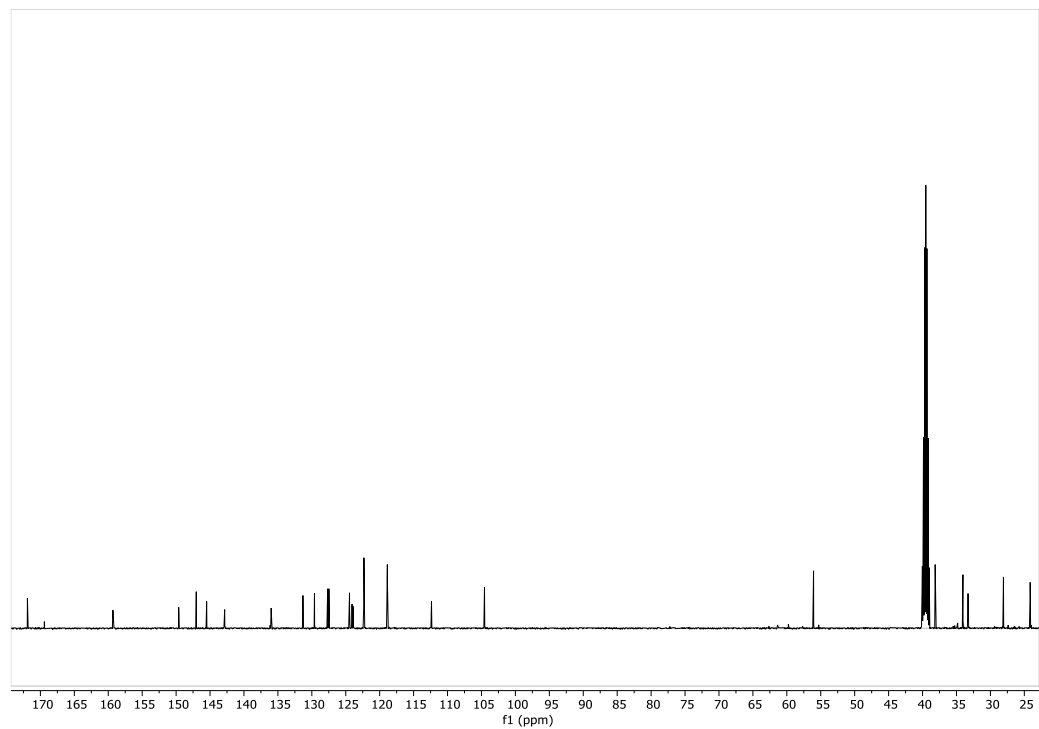

Figure S2.  $^{13}\text{C}$  NMR spectrum of L1

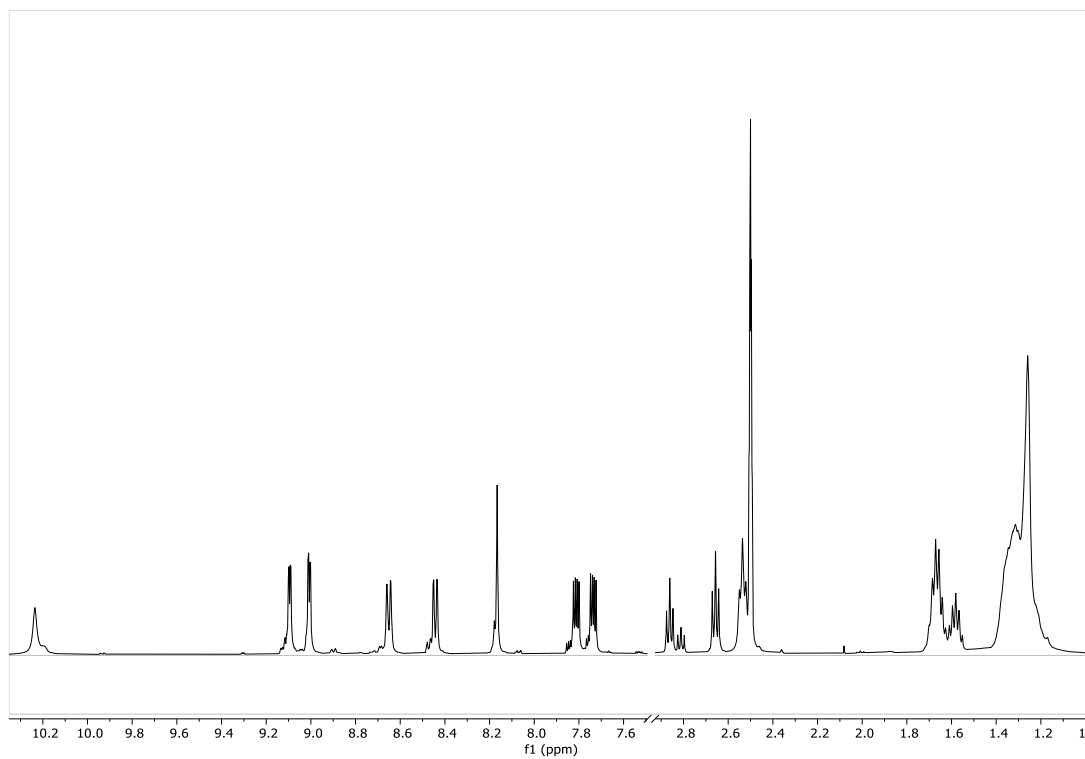

Figure S3.  $^1\text{H}$  NMR spectrum of L2

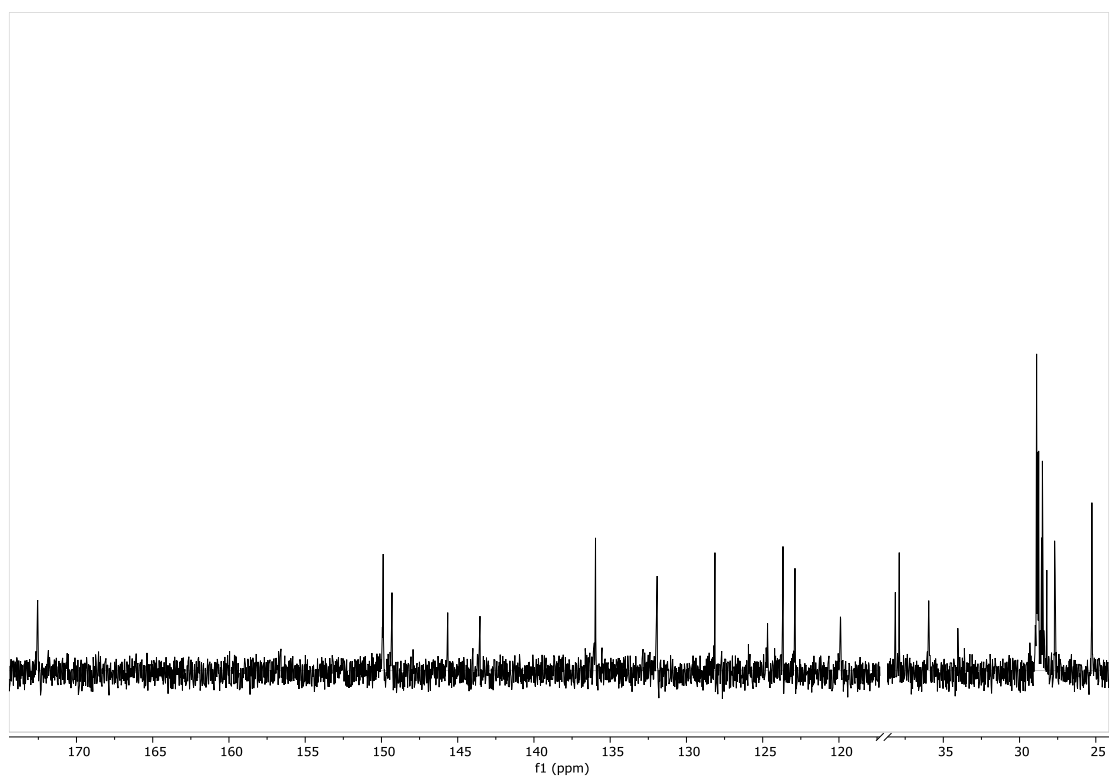

Figure S4.  $^{13}\text{C}$  NMR spectrum of L2

## Mass Spectrometry Spectra

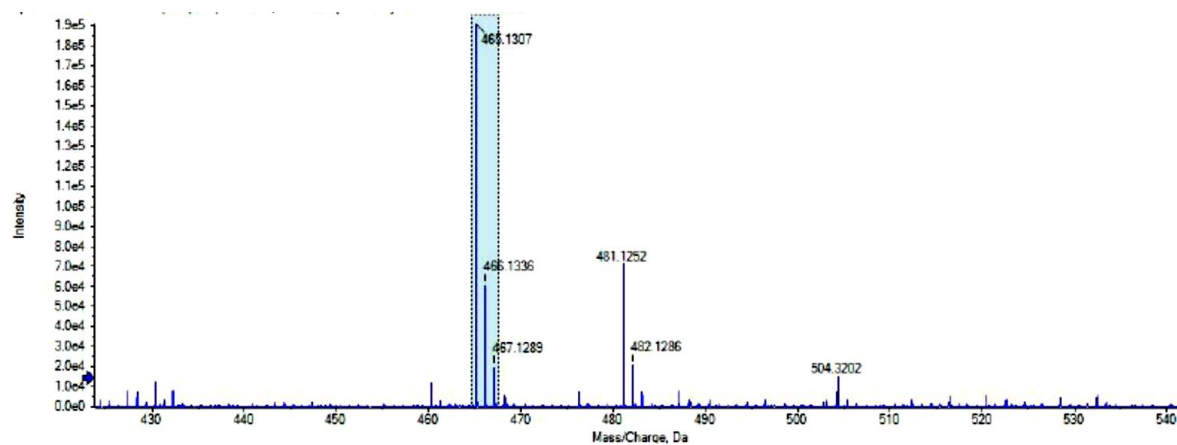

Figure S5. Mass Spectrometry Spectrum of L1

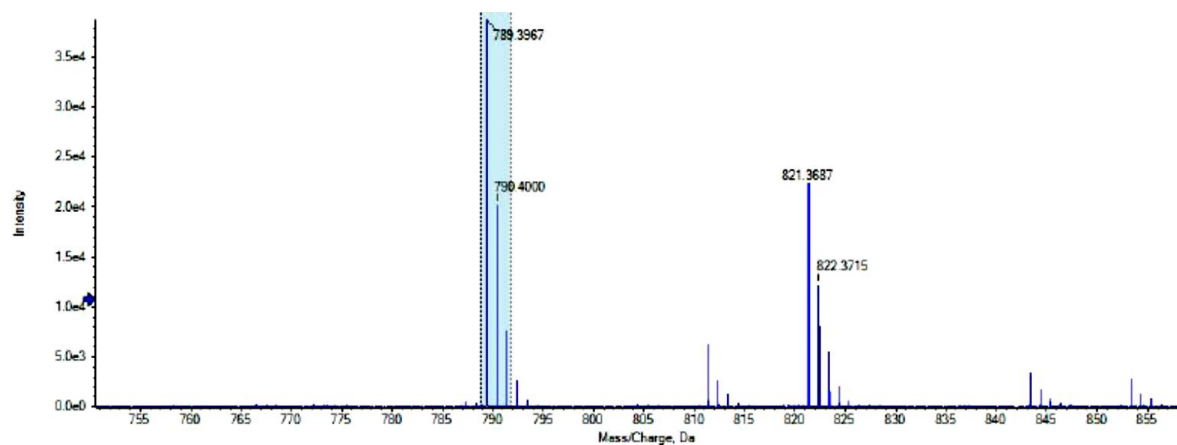

Figure S6. Mass Spectrometry Spectrum of L2

## GNP1 Characterization

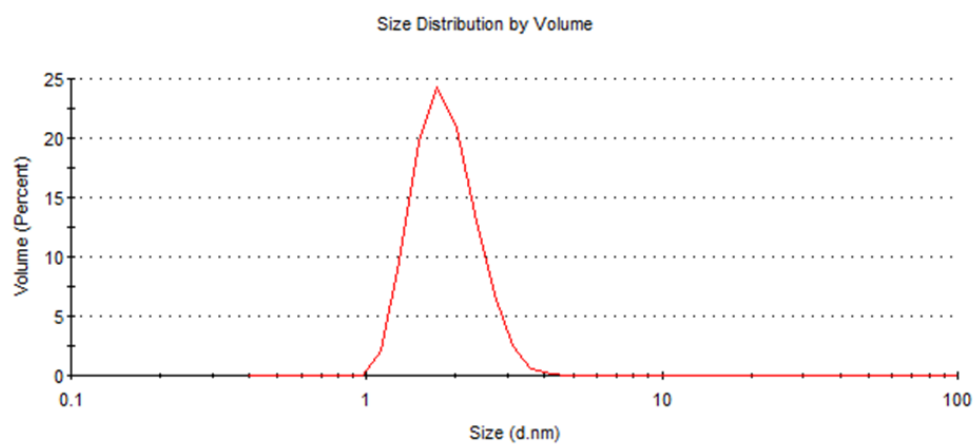

Figure S7. **GNP1** DLS size distribution

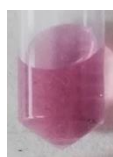

Water

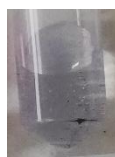

Buffer pH 6.5

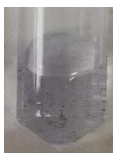

Buffer pH 7.5

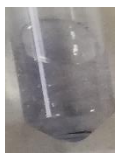

Buffer pH 8.5

Figure S8. **GNP1** stability in different buffers

## UV-Vis Spectra

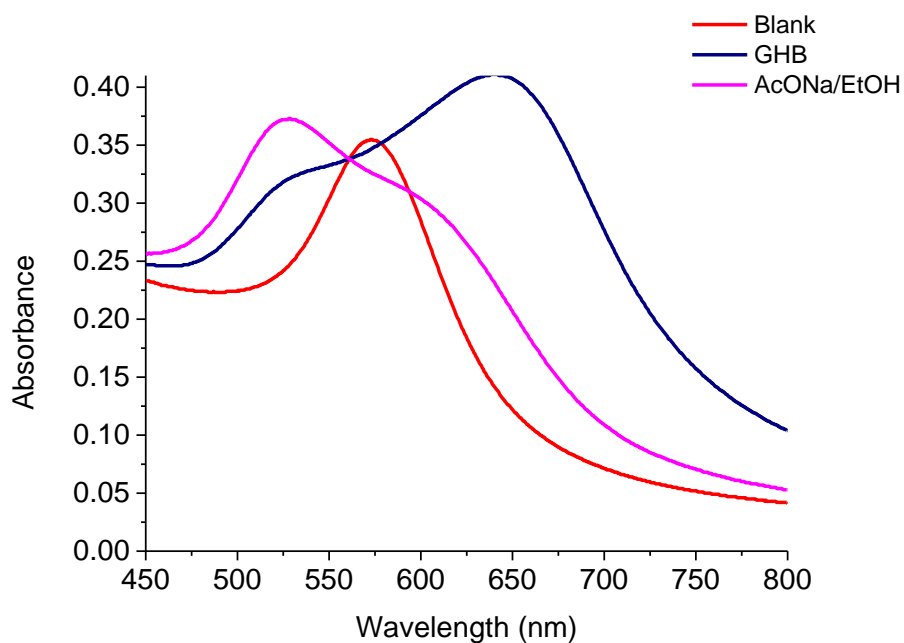

Figure S9. UV-visible changes of sensor **GNP1** with 35 mM GHB and a 35 mM mixture of AcONa/EtOH using water deionised as solvent.

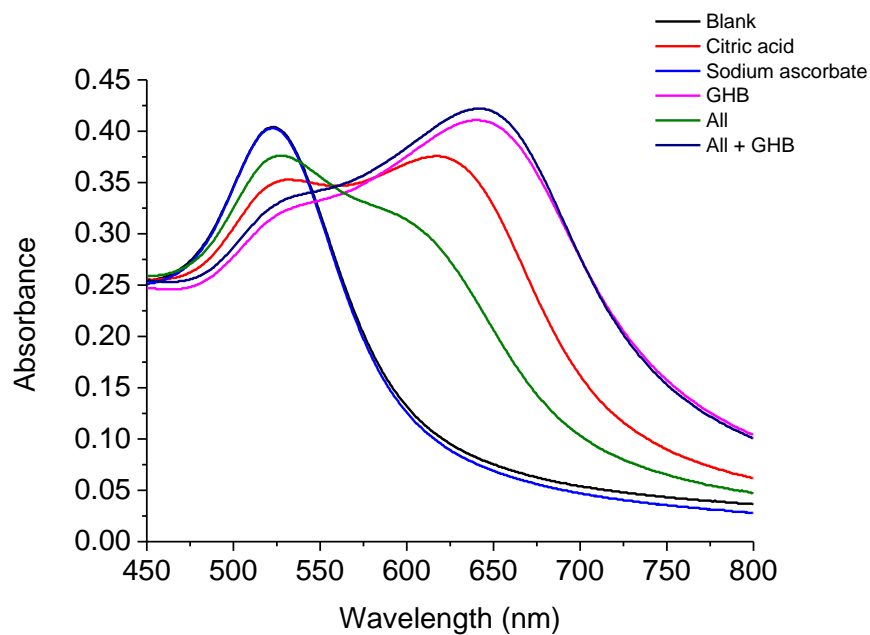

Figure S10. Absorbance spectra of **GNP1** in the presence of citric acid, sodium ascorbate, in the real concentration present in beverages, and NaGHB (35 mM).

## Real samples

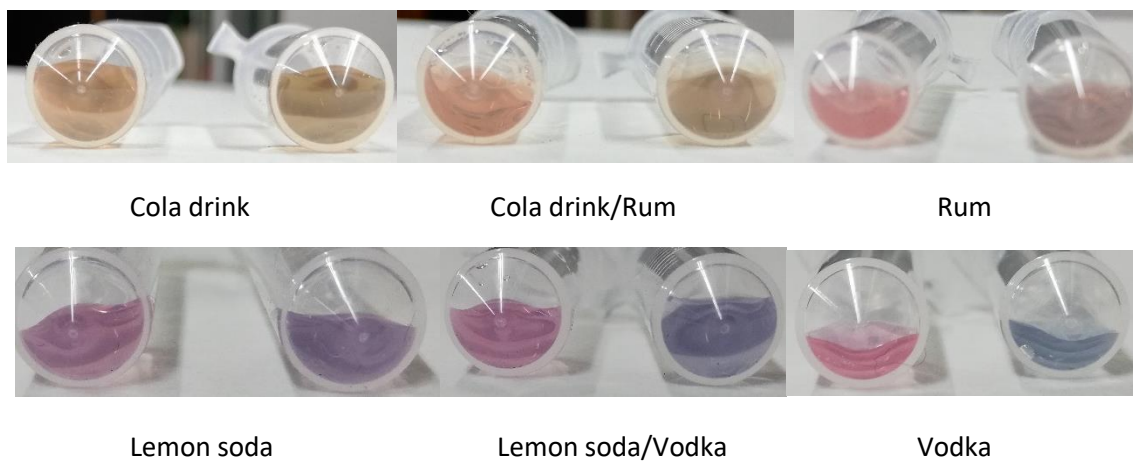

Figure S11. Colour changes in real samples

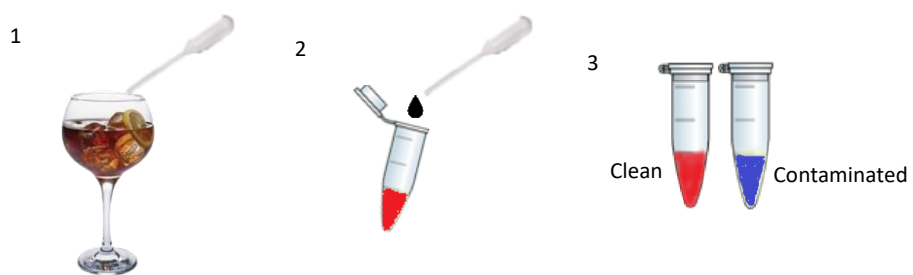

Figure S12. Instructions sheet for an on-site safety kit based on GHB detection
